# Supplementary material for: Growth of Statewide Emergency Medical Services Bypass Policies for Acute Stroke
Source: PubMed Central journal article supplement — JAMA Health Forum. 2024 Jul 5;5(7):e241752. doi: 10.1001/jamahealthforum.2024.1752 (PMC11227071; doi:10.1001/jamahealthforum.2024.1752), 2024-07-05
Supplement: jamahealthforum-e241752-s001.pdf [file jamahealthforum-e241752-s001.pdf]

## Data Sharing Statement

Dunkley. Growth of Statewide Emergency Medical Services Bypass Policies for Acute Stroke. *JAMA Health Forum*. Published July 05, 2024. doi:10.1001/jamahealthforum.2024.1752

### Data

**Data available:** No

### Additional Information

**Explanation for why data not available:** Data are publicly available.
